# Supplementary material
Source: Elsevier journal article supplement (https://www.sciencedirect.com/science/article/pii/S0212656717302263)
Supplement: mmc1 [file S0212656717302263:mmc1.docx]

***Estimado Doctor***

***Antes de contestar a las preguntas, lea con atención las siguientes recomendaciones. Tenga en cuenta que no se trata de un examen de sus conocimientos, sino de la actitud que realmente Ud. toma en su consulta cotidiana ante sus pacientes con dislipemia, independientemente del conocimiento que Ud. posea de las guías de actuación clínica y de la dislipemia como patología. Como sabe, Ud. puede no estar en acuerdo total con las recomendaciones que establecen las guías de actuación, o no conocerlas en toda su amplitud, o simplemente actuar de una manera determinada según su saber. Nos interesa el proceder real en su consulta. Tenga en cuenta, que las respuestas son tratadas confidencial y encriptadamente. Ni los promotores del estudio, ni la CRO contratada para llevar a cabo el análisis estadístico conocerán en ningún momento al médico que está respondiendo al cuestionario. En la primera sección del cuestionario, hay preguntas personales (como edad, especialidad, etc.) que son necesarias para evaluar los objetivos del estudio, pero que no pueden desenmascarar su identidad. La finalidad de este estudio es evaluar aquellos factores que podrían en un futuro ayudar a mejorar en el manejo de los pacientes con dislipemia. Las respuestas no siguen la metodología de un examen, que insistimos que no es el objetivo del estudio, y son de tipo categórico, con respuesta única o con la posibilidad de múltiples respuestas. Puesto que las preguntas van dirigidas tanto a médicos de Asistencia Primaria como a médicos de Asistencia Especializada, en ocasiones puede pensar que la pregunta no va dirigida a Ud., pero no importa, responda también, pues el enfoque puede variar según la especialidad. Por ello, verá que el cuestionario está estructurado en 4 apartados: uno de características del médico, otro de las características del paciente que asiste, otro de la dislipemia en general y, finalmente, otro de la dislipemia en determinadas circunstancias clínicas. Para acabar, permítame insistir en un aspecto. Por favor, no conteste lo que sabe, sino lo que realmente hace. Ánimo, el presente cuestionario le llevará aproximadamente 15-20 minutos, no necesita consultar ningún texto. Gracias por el tiempo dedicado.***

A continuación se enumeran las cuestiones de los 4 apartados.

**APARTADO A**

**Características del Centro y Médico**

1) ¿Sexo?

1. Hombre.
2. Mujer.

2) ¿Su edad es?

1. __ años.

3) ¿Ud. es médico de AP o especialista?

1. Especialistas de Atención Primaria o Medicina General
2. Otras especialidades

4) En el segundo caso, ¿de qué especialidad?

1. Cardiología.
2. Medicina Interna.
3. Nefrología.
4. Endocrinología.
5. Geriatría.
6. Otra. Especificar……

5) ¿Ud. trabaja?

1. Consulta general (de AP o de mi especialidad).
2. Unidad de Riesgo Vascular (Cardiovascular, Dislipemia, HTA, etc).
3. Consulta especializada (dentro de la especialidad o de AP).
4. Consulta privada o de mutua.
5. Otra. Especificar……

6) La plaza de trabajo que Ud. tiene, cree que se adapta más a:

1. Plaza “eventual”
2. Plaza “fija”

7) ¿Ud. puede prescribir fármacos con recetas del Sistema Nacional de Salud?

1. Sí.
2. No.

8) ¿Ud. tiene un cupo limitado para prescribir fármacos “de marca”?

1. Sí (Ir a la Pregunta 9).
2. No (Ir a la Pregunta 10).

9) ¿En qué medida piensa que Ud. cumple el “cupo” que tiene asignado?

1. Entre el 80-100%
2. Entre el 60-80%
3. Entre el 40-60%
4. Entre el 20-40%
5. Entre el 0-20%

10) ¿Se siente Ud. condicionado para prescribir libremente?

1. Nada en absoluto
2. En alguna medida
3. En gran medida
4. Totalmente

**APARTADO B**

**Características del paciente que atiendo con dislipemia**

11) Aunque la definición de dislipemia está establecida por diferentes sociedades médicas, en ocasiones pueden existir discrepancias. En su caso concreto, para catalogar a un paciente de dislipémico, en qué se basa (Puede marcar más de una respuesta):

1. Me fijo en el colesterol total.
2. Me fijo en el colesterol total y en los triglicéridos.
3. Me fijo en el cLDL, cHDL y triglicéridos.
4. Me guío por la presencia de otros factores de RCV junto al cLDL y triglicéridos.
5. En un diagnóstico ya establecido por otros médicos.

12) En general el paciente dislipémico que atiendo tiene una edad de:

1. Inferior a 40 años.
2. Entre 40 y 60 años.
3. Entre 60 y 70 años.
4. Más de 70 años.

13) A un paciente no lo trato farmacológicamente si tiene más de los siguientes años.:

1. Más de 75 años.
2. Más de 80 años.
3. Más de 85 años.
4. A partir de los 80 años según el criterio clínico individualizado.

14) Al paciente dislipémico que atiende en su consulta, en general suele presentar los siguientes factores de RCV asociados:

1. Ningún otro factor de RCV
2. 1-2 factores de RCV
3. 3-4 factores de RCV
4. Más de 4 factores de RCV

15) El paciente dislipémico que atiendo, en general suele tomar otros fármacos para otras patologías de forma habitual:

1. Ningún otro fármaco
2. 1 fármaco
3. 2 fármacos
4. 3 fármacos
5. 4 fármacos
6. 5 o más fármacos

16) En caso de que Ud. remita a algunos de sus pacientes con dislipemia a un especialista en lípidos, ¿cuándo lo remite? (Puede marcar más de una respuesta):

1. Escasa respuesta a un tratamiento adecuado y con un cumplimiento adecuado una vez descartado causas secundarias
2. Sospecha de HFH, Disbetalipoproteinemia, Hiperlipemia Familiar Combinada, o Síndrome de Hiperquilomicronemia para confirmación diagnostica i establecer tratamiento.
3. Mal control de la dislipemia asociada a I.Renal grave, hepatopatía crónica grave, tratamiento inmunosupresor o embarazo.
4. Estudio de pacientes con Cardiopatía isquémica i sin FRCV aparentes.
5. Efectos secundarios o intolerancia a múltiples fármacos hipolipemiantes.

**APARTADO C**

**Manejo General de los Pacientes con Dislipemia**

17) Para Ud. ¿Cuál sería el valor aconsejable de cLDL para la población adulta sin otros factores de RCV?:

1. < 190 mg/dl.
2. < 160 mg/dl.
3. < 130 mg/dl.
4. < 100 mg/dl.
5. < 70 mg/dl.

18) Para Ud. ¿Cuál sería el valor aconsejable de cLDL en el caso de que el paciente además sea hipertenso?:

1. < 190 mg/dl.
2. < 160 mg/dl.
3. < 130 mg/dl.
4. < 100 mg/dl.
5. < 70 mg/dl.

19) Para Ud. ¿Cuál sería el valor aconsejable de cLDL en el caso de que el paciente además sea fumador activo?:

1. < 190 mg/dl.
2. < 160 mg/dl.
3. < 130 mg/dl.
4. < 100 mg/dl.
5. < 70 mg/dl.

20) Para Ud. ¿Cuál sería el valor aconsejable de cLDL en prevención secundaria en el caso de que el paciente además haya presentado un ictus aterotrombotico?:

1. < 190 mg/dl.
2. < 160 mg/dl.
3. < 130 mg/dl.
4. < 100 mg/dl.
5. < 70 mg/dl.

21) Para Ud. ¿Cuál sería el valor aconsejable de cLDL en el caso de que un paciente mayor de 70 años y con episodio AVC?:

1. < 190 mg/dl.
2. < 160 mg/dl.
3. < 130 mg/dl.
4. < 100 mg/dl.
5. < 70 mg/dl.

22) En el caso de que estén alterados (aumentados) tanto el cLDL como los trigliéridos, ¿Cuál es su prioridad?:

1. Reducir el cLDL
2. Reducir la hipertrigliceridemia
3. Reducir ambos simultáneamente
4. Dependerá de otros factores de RCV asociados

23) Cuando un paciente está polimedicado ¿tiene en consideración?

1. La posibilidad de interacciones.
2. No, suelo utilizar en principio siempre el mismo fármaco.

24) Cuando un paciente no está controlado, es decir, no ha alcanzado el objetivo de cLDL que Ud. tiene marcado para ese paciente, suele actuar de la siguiente manera (Puede marcar más de una respuesta):

1. Insistir en medidas dietéticas y esperar.
2. Incrementar la dosis del fármaco.
3. Variar de fármaco.
4. Efectuar un tratamiento combinado.
5. No suelo hacer nada y espero el siguiente control.
6. Depende de la categoría de RCV a la que pertenece el paciente.

25) ¿Suele Ud. tener en consideración el RCV global del pacientes para decidir su tratamiento?:

1. Sí, siempre.
2. No, nunca.
3. A veces.
4. Si tengo disponible en ese momento las tablas o calculadoras.

26) ¿Suele considerar la edad para el cálculo del riesgo cardiovascular?

1. No.
2. Por encima de los 45 años.
3. Por encima de los 50 años.
4. Por encima de los 55 años.
5. Por encima de los 60 años.
6. Siempre

27) En el caso de que Ud. efectúe el cálculo del RCV del paciente, ¿qué escala utiliza?:

1. La escala SCORE.
2. La escala de Framingham.
3. La escala REGICOR.
4. La que tengo a mano en mi consulta.
5. La que se ha consensuado en nuestra Unidad.
6. La verdad, no reparo en el tipo de escala.

28) ¿Con qué fármaco suele iniciar el tratamiento de una dislipemia con un cLDL elevado? (Puede marcar más de una respuesta):

1. Lovastatina.
2. Pravastatina.
3. Fluvastatina.
4. Simvastatina.
5. Atorvastatina.
6. Rosuvastatina.
7. Pitavastatina.
8. Una estatina combinada con ezetimiba.
9. Un fármaco que no pertenece al grupo de estatinas.

29) En caso de utilizar una combinación de hipolipemiantes ¿Cuál es la que utiliza o las que utiliza con más frecuencia? (Puede marcar más de una respuesta):

1. Estatina y fibrato.
2. Estatina y ezetimiba.
3. Estatina y niacina
4. Niacina y fibrato.
5. Estatina, ezetimiba y fibrato.
6. Nunca utilizo combinaciones.

30) En el caso de utilizar una combinación de hipolipemiantes ¿Cuándo la suele emplear? (Puede marcar más de una respuesta):

1. Cuando no alcanzo el objetivo del cLDL.
2. Cuando los triglicéridos están elevados independietemente de tener controlado el cLDL.
3. Cuando el cHDL está bajo independientemente de tener controlado el cLDL.
4. Cuando el cHDL y los triglicéridos están fuera del objetivo propuesto aunque el cLDL esté controlado.
5. Cuando no están dentro del objetivo propuesto el cLDL, cHDL y los triglicéridos.

**APARTADO D**

**Manejo de la dislipemia en determinados perfiles de pacientes**

31) Cuando trata un paciente dislipémico tiene en consideración si el paciente ya ha presentado una complicación en un territorio vascular, como un by-pass o amputación en una extremidad inferior, un by-pass o stent coronario, un ictus isquémico.

1. No.
2. Sí.

32) En un paciente diabético:

1. Siempre calculo el RCV.
2. No lo calculo nunca.
3. Sólo lo calculo si presenta otros factores de RCV asociados.
4. No lo calculo porque ya considero que es un paciente de alto riesgo CV.

33) Para Ud. ¿cuál sería el valor aconsejable de cLDL para la población adulta diabética?:

1. < 190 mg/dl.
2. < 160 mg/dl.
3. < 130 mg/dl.
4. < 100 mg/dl.
5. < 70 mg/dl.

34) En un paciente con Enfermedad Arterial Periférica:

1. Siempre calculo el RCV.
2. No lo calculo nunca.
3. Sólo lo calculo si presenta otros factores de RCV asociados.
4. No lo calculo porque ya considero que es un paciente de muy alto riesgo CV.

35) Para Ud. ¿cuál sería el valor aconsejable de cLDL en un paciente con Enfermedad Arterial Periférica?:

1. < 190 mg/dl.
2. < 160 mg/dl.
3. < 130 mg/dl.
4. < 100 mg/dl.
5. < 70 mg/dl.

36) En el caso de que decidiera tratar con una estatina al paciente con Enfermedad Arterial Periférica ¿Cuál escogería? (Puede marcar más de una respuesta):

1. Lovastatina.
2. Pravastatina.
3. Fluvastatina.
4. Simvastatina.
5. Atorvastatina.
6. Rosuvastatina.
7. Pitavastatina.
8. Me es indiferente.
9. La más barata.
10. La que autorice la gestión del centro.

37) Y en el caso de que el paciente diabético hubiera presentado una complicación CV, como un infarto, un ictus o una EAP ¿Cuál sería el valor aconsejable de cLDL?:

1. < 190 mg/dl.
2. < 160 mg/dl.
3. < 130 mg/dl.
4. < 100 mg/dl.
5. < 70 mg/dl.

38) En el paciente diabético que ha de tratar con una estatina ¿Influye la diabetes sobre la estatina que ha de escoger?

1. No.
2. Sí.

39) En el caso de que decidiera cambiar de estatina en el paciente diabético ¿Cuál escogería? (Puede marcar más de una respuesta):

1. Lovastatina.
2. Pravastatina.
3. Fluvastatina.
4. Simvastatina.
5. Atorvastatina.
6. Rosuvastatina.
7. Pitavastatina.
8. Me es indiferente.
9. La más barata.

40) En un paciente diabético de larga evolución (más de 15 años de diagnóstico):

1. Lo trato siempre con estatinas independientemente del perfil lipídico.
2. Sólo lo trato de acuerdo a los objetivos de las guías .

41) ¿Cuál sería el valor aconsejable de cLDL en el caso de que el paciente además presente cardiopatía isquémica?:

1. < 190 mg/dl.
2. < 160 mg/dl.
3. < 130 mg/dl.
4. < 100 mg/dl.
5. < 70 mg/dl.

42) ¿Ud. considera el mismo objetivo si el paciente presenta una cardiopatía isquémica tipo angina estable o ha requerido la colocación de un stent o se ha efectuado un by-pass coronario?

1. Sí.
2. No, suelo considerar un valor más bajo de cLDL si ha precisado intervención coronaria.

43) En el caso de que el paciente con cardiopatía isquémica dislipémico que trata no ha conseguido el nivel de cLDL que considera adecuado mediante el tratamiento con una estatina en monoterapia, ¿qué actitud es la que Ud. suele emplear? (Puede marcar más de una respuesta):

1. Sigo la misma pauta. Espero.
2. Voy aumentándola dosis de estatina.
3. Cambio de estatina.
4. Añado otro fármaco.
5. la asociación de ezetimiba y estatina es la siguiente opción en la mayoría de los casos”

44) En un paciente con evidencia de cardiopatía isquémica. ¿Suele tener en cuenta el “riesgo lipídico residual”?

1. Si.
2. No.

45) En un paciente con cardiopatía isquémica establecida y dislipemia mixta en la que hemos logrado el control del c-LDL y del c-No HDL con una estatina, pero persiste una alteración de los triglicéridos o del c-HDL.

1. Aumento la dosis de estatina.
2. Trato la trigliceridemia aunque el nivel podría considerarse óptimo para otro perfil de paciente.
3. Considero tratar los niveles de cHDL bajos con niacina.
4. Trato la trigliceridemia aunque el nivel podría considerarse óptimo para otro perfil de paciente.
5. Considero tratar los niveles de cHDL bajos con niacina.
6. Cambio a una estatina con un mayor efecto sobre el c-HDL y/o triglicéridos

46) Referente a la función renal del paciente. ¿Suele prestar atención o calcular o solicitar la función renal estimada por fórmula de su paciente?

1. No, nunca.
2. Sólo si el laboratorio ofrece el resultado.
3. Sí, siempre.

47) ¿Trata la dislipemia de un paciente con ERC independientemente del estadio de la enfermedad?

1. Sí.
2. No.

48) En el paciente con ERC y dislipemia que decide tratar. ¿Suele ajustar la dosis del fármaco al filtrado glomerular?

1. No, nunca.
2. Sí, siempre.
3. Sólo en estadios muy avanzados.
4. Utilizo una estatina con un bajo porcentaje de excreción renal y sin evidencia de un potencial efecto negativo sobre la función renal
5. La verdad, no presto atención a este aspecto.

49) Y en la siguiente situación para Ud. ¿Cuál sería el valor aconsejable de cLDL en el caso de que el paciente presente una enfermedad renal crónica, con un filtrado glomerular estimado < 60 ml/min?:

1. < 190 mg/dl
2. < 160 mg/dl.
3. < 130 mg/dl.
4. < 100 mg/dl.
5. < 70 mg/dl.

50) En el caso de que decidiera cambiar de estatina en el paciente renal ¿Cuál escogería? (Puede marcar más de una respuesta):

1. Lovastatina.
2. Pravastatina.
3. Fluvastatina.
4. Simvastatina.
5. Atorvastatina.
6. Rosuvastatina.
7. Pitavastatina.
8. Me es indiferente.
9. La más barata.

51) En un paciente polimedicado ¿suelo considerar la posibilidad de interacciones cuando prescribo un hipolipemiante?

1. No, nunca.
2. Sí, siempre.
3. Sólo si observo una respuesta “anómala”.

52) Referente a la hipertrigliceridemia, la suelo tratar:

1. Si es < 200 mg/dL en el paciente de alto riesgo
2. Si es > 500 mg/dL después de las medidas de hábitos de vida con independencia del riesgo vascular
3. Solo si es mayor de 1000 mg/dL
4. Nunca trato la hipertrigliceridemia

53) Referente a un valor de cHDL bajo:

1. No lo trato nunca.
2. Tomo medidas para controlarlo.

54) En caso de que decida controlar un cHDL bajo ¿Qué medidas emplea? (Puede marcar más de una respuesta):

1. Insisto en las medidas modificadoras del estilo de vida.
2. Añado o incremento la dosis de estatina.
3. Utilizo un fibrato.
4. Utilizo ezetimiba.
5. Utilizo niacida.
6. Cambio a una estatina con una mayor efecto potencial sobre el c-HDL

55) Ante un paciente con varios factores de RCV asociados, ¿intenta ver si se integran en lo que se ha dado en llamar síndrome metabólico?

a) Sí

b) No.

56) Si un paciente le diagnostica o le viene diagnosticado con síndrome metabólico. Considera que tiene un riesgo CV:

1. Bajo.
2. Moderado.
3. Alto.
4. Muy alto.

57) En el caso de que el paciente presentara síndrome metabólico ¿Qué estatina escogería? (Puede marcar más de una respuesta):

1. Lovastatina.
2. Pravastatina.
3. Fluvastatina.
4. Simvastatina.
5. Atorvastatina.
6. Rosuvastatina.
7. Pitavastatina.
8. Me es indiferente.

58) ¿Está de acuerdo que algunos laboratorios no determinen los niveles de cLDL, aunque Ud. lo haya solicitado, porque los protocolos de gerencia establecen no determinarlo si el colesterol total está por debajo de cierto valor?

a) Si.

b) No.

59) De los siguientes parámetros del perfil lipídico, ¿Cuáles suele solicitar en laboratorio? (Puede marcar más de una respuesta):

1. Colesterol total.
2. cLDL.
3. cHDL.
4. Triglicéridos.
5. cVLDL.
6. lipoproteina(a).
7. Depende del perfil de RCV del paciente.
